# Supplementary material for: Axogenic mechanism enhances retinal ganglion cell excitability during early progression in glaucoma
Source: PubMed Central journal article supplement — Proc Natl Acad Sci U S A. 2018 Feb 20;115(10):E2393–402. doi: 10.1073/pnas.1714888115 (PMC5877940; doi:10.1073/pnas.1714888115), 2018-02-20
Supplement: pnas.201714888SI.pdf [file pnas.201714888SI.pdf]

# Supporting Information

Risner et al. 10.1073/pnas.1714888115

## SI Methods

**DBA/2J Mice.** We obtained DBA/2J mice (3 and 10 mo, male) from the Jackson Laboratories. Animals were maintained in a 12-h light/dark cycle with standard rodent chow and water available ad libitum.

**Isolating AMPA-Mediated Responses.** We measured the voltage-clamped ( $-65$  mV) AMPA receptor-mediated response to light and to AMPA ( $100$   $\mu$ M; Sigma-Aldrich) dissolved in normal Ames' medium and delivered to the cell body via a puff pipette using a controlled pneumatic system (20 psi, 20 ms duration, Picospritzer II; General Valve Co.). For these recordings, the extracellular solution included pharmacological agents to block voltage-gated  $\text{Na}^+$  channels (tetrodotoxin,  $1$   $\mu$ M; Tocris), GABA<sub>A</sub> receptors (picrotoxin,  $50$   $\mu$ M; Sigma-Aldrich), glycine receptors (strychnine,  $1$   $\mu$ M; Sigma-Aldrich), and NMDA receptors (AP5,  $50$   $\mu$ M; Abcam). To confirm isolation of AMPA-derived current, we added CNQX ( $50$ – $100$   $\mu$ M; Abcam) in the extracellular solution to block all AMPA/kainate receptors for comparison.

**Quantification of Immunolabeling.** Following perfusion of separate mouse cohorts, we prepared frozen sections through retinas of both eyes after either 2 or 4 wk of unilateral microbead-induced elevations in IOP. We labeled these sections using the following primary antibodies: anti-PSD95 (1:200; Alomone Labs), anti-RIBEYE (1:100; BD Transduction Laboratories), anti-NaV1.6 (1:200; Alomone Labs), and anti-ChAT (1:100; Millipore). For PSD95 immunostaining, sections were pretreated with  $10$  mM sodium citrate pH 6.0  $90^\circ\text{C}$  for 30 min. Other procedures were as previously described (1). We used identical microscope settings to acquire confocal images of microbead vs. saline retinas and quantified signal in the synaptic layers by subtracting the background intensity followed by normalization with ChAT signal, which did not depend on IOP. We analyzed and averaged 2–4 images per sample. In whole retinas harvested from additional mice after 2 or 4 wk of IOP elevation, we used ImageJ to quantify NaV1.6 in RGC bodies and axons identified using antibodies against Brn3a (1:200; Santa Cruz Biotechnology) or SMI32 (1:1,000), respectively. We obtained 2–4 stacks of confocal micrographs through individual planes ( $60\times$ ) for each of 3–5 retinas in each experimental group. We quantified intensity of NaV1.6 in RGC bodies within the plane of densest Brn3a label and in axons within the plane of densest SMI32 label. We also quantified at higher magnification ( $180\times$ ) NaV1.6 in confocal stacks through SMI32-labeled varicosities in the proximal axon segment adjoining the RGC body.

**Colocalization Analysis.** Vertical frozen sections from saline ( $n = 6$ ), 2-wk ( $n = 3$ ), and 4-wk ( $n = 3$ ) microbead retinas were simultaneously immunolabeled for PSD95 and RIBEYE (as described above). Two  $200\times$  confocal images (Fluoview 1000) of randomly selected inner plexiform layer areas per condition were acquired. We assessed colocalization between PSD95 and RIBEYE using the Coloc2 plugin within ImageJ software. The intensity threshold of each image was calculated, and we assessed the percentage of colocalization between PSD95 and RIBEYE (tM1) and the percentage of colocalization of RIBEYE to PSD95 (tM2) (2).

**Measuring Inhibitory Currents.** To investigate light-evoked inhibitory currents, using the same 365-nm light stimulus as described in the main text, we performed voltage-clamp recordings

( $V_c = +10$  mV) from RGCs in whole-mount retinas. Pipettes contained (in mM) 105 CsMeSO<sub>3</sub>, 6 tetraethylammonium-Cl, 20 Hepes, 10 EGTA, 5 Mg-ATP, 0.5 Tris-GTP, 2 QX314-Cl, 0.1 Spermine, and 0.1 Alexa 555 (pH 7.3, Osm = 280, pipette resistance 5–7 M $\Omega$ ). RGC type was verified by light response profiles in real time and later confirmed by recovering RGC dendritic stratification within the inner plexiform layer and SMI32 labeling using confocal microscopy as described.

## SI Results

**Pruning of  $\alpha$ OFF-T RGC Dendritic Arbors.** The dendritic arbors of  $\alpha$ OFF-T RGCs demonstrated dramatically reduced size and complexity following 2 wk of elevated IOP, which was significant by Sholl analysis within a radius of 130–240  $\mu$ m from the soma (Fig. S4C). This change corresponded to a significant reduction in average dendritic field area (33%) and total dendrite length (23%) compared with control at 2 wk ( $P \leq 0.05$ ; Fig. S4D). Once again, although dendritic complexity, field area, and total length remained significantly diminished ( $P \leq 0.02$ ), pruning did not progress between 2 and 4 wk of elevation.

**Pruning in the DBA/2J Mouse.** Our results from the inducible model indicate both ON and OFF dendritic arbors are susceptible to pruning. To test this more broadly, we quantified RGC dendritic complexity in DBA/2J mice. For dye-filled DBA/2J RGCs classified as ON, OFF, or ON-OFF based on dendritic stratification (Fig. S5A), we noted significant reductions in dendritic complexity in retinas from aged animals (10 mo) compared with naïve C57 (Fig. S5B and C). When quantified using Sholl analysis, for young (3 mo) DBA/2J retina, only ON RGCs demonstrated a modest reduction in complexity, and then only close to the cell body (Fig. S6A). Interestingly, these same cells showed slightly more dendritic complexity at midrange distances compared with C57. By 10 mo, all RGCs had reduced dendritic field complexity and area and diminished total dendrite length and branch points (Fig. S6). Thus, dendritic pruning in both inducible and chronic models affects ON and OFF arbors alike.

**AMPA-Mediated Responses.** We isolated pharmacologically the influence of excitatory AMPA receptor signaling in RGCs by silencing other glutamatergic receptors, voltage-gated sodium channels, and inhibitory currents (3) (Fig. S7). Under these conditions,  $\alpha$ ON-S RGCs failed to demonstrate an enhanced response to light onset; indeed, the AMPA-mediated response integrated over the duration of the light stimulus did not change at all with elevated IOP ( $P = 0.75$ ; Fig. S7B). We obtained a similar result for  $\alpha$ OFF-S RGCs ( $P = 0.16$ ; Fig. S7C and D). For ON-OFF RGCs, the AMPA-mediated light response did not differ from control after 2 wk of elevated IOP for either the ON or OFF component ( $P \geq 0.38$ ; Fig. S7C and D). However, by 4 wk, both components significantly declined compared with control ( $P \leq 0.03$ ). Similarly, the response for  $\alpha$ OFF-T RGCs did not change after 2 wk ( $P = 0.22$ ), but did diminish by four ( $P = 0.05$ ; Fig. S7C and D). Finally, we tested the response of  $\alpha$ ON-S and ON-OFF RGCs to AMPA delivered directly to the cell by puff pipette (Fig. S7E). This measurement reflects the activity of postsynaptic AMPA receptors (4). The response to AMPA for both RGC types decreased progressively between 2 and 4 wk of IOP elevation, with the integrated current response reaching a significant reduction by 4 wk (Fig. S7F).

**Excitatory Glutamatergic Signaling Components.** Localization of PSD95, which stabilizes the glutamatergic postsynaptic density on RGC dendrites (5, 6), remained near control levels in the inner plexiform layer after 2 wk of elevated IOP (Fig. S8 *A* and *B*). However, by 4 wk of elevated IOP, PSD95 levels diminished significantly in the inner plexiform layer compared with control ( $P = 0.003$ ). PSD95 did not change in the outer retina for either time ( $P \geq 0.12$ ), nor did it differ between the ON and OFF sublaminae ( $P \geq 0.09$ ). Surprisingly, we found that 2 wk of elevated pressure increased the presynaptic ribbon marker RIBEYE by twofold in the inner plexiform layer compared with control ( $P = 0.04$ ); by 4 wk, label returned to control levels ( $P = 0.14$ ; Fig. S8 *C* and *D*). Label for RIBEYE did not differ between the ON and OFF sublaminae for either 2 or 4 wk of elevated pressure ( $P \geq 0.08$ ), nor did levels change in the outer retina where

photoreceptor axon terminals ramify ( $P \geq 0.15$ ). Even as RIBEYE increased, colocalization with PSD95 did not change for either IOP exposure compared with control retina ( $P \geq 0.47$ ; Fig. S8 *E* and *F*).

**Inhibitory Currents Do Not Change.** We recorded from  $\alpha$ ON-S RGCs under pharmacological and voltage parameters that isolate chloride-driven inhibitory currents (3). Under these conditions,  $\alpha$ ON-S RGCs demonstrate a sustained outward current in response to light due to chloride influx that was similar between control and 2-wk cells (Fig. S8*G*). When quantified across cells, the chloride-driven inhibitory current did not differ between control and 2-wk  $\alpha$ ON-S RGCs ( $P = 0.5$ ; Fig. S8*H*). We found a similar result for several OFF RGCs ( $P \geq 0.48$ ). The minor reduction in response we do see at 2 wk is consistent with early changes in GABAergic signaling observed in other glaucoma models (7, 8).

- Weitlauf C, et al. (2014) Short-term increases in transient receptor potential vanilloid-1 mediate stress-induced enhancement of neuronal excitation. *J Neurosci* 34: 15369–15381.
- Manders EMM, Verbeek FJ, Aten JA (1993) Measurement of co-localization of objects in dual-colour confocal images. *J Microsc* 169:375–382.
- Sullivan SJ, Miller RF (2012) AMPA receptor-dependent, light-evoked D-serine release acts on retinal ganglion cell NMDA receptors. *J Neurophysiol* 108:1044–1051.
- Cohen ED (2000) Light-evoked excitatory synaptic currents of x-type retinal ganglion cells. *J Neurophys* 83:3217–3229.
- Euler T, Haverkamp S, Schubert T, Baden T (2014) Retinal bipolar cells: Elementary building blocks of vision. *Nat Rev Neurosci* 15:507–519.
- Morgan JL, Schubert T, Wong RO (2008) Developmental patterning of glutamatergic synapses onto retinal ganglion cells. *Neural Dev* 3:8.
- Moon JI, et al. (2005) Changes in retinal neuronal populations in the DBA/2J mouse. *Cell Tissue Res* 320:51–59.
- Zhou X, et al. (2017) Alpha7 nicotinic acetylcholine receptor agonist promotes retinal ganglion cell function via modulating GABAergic presynaptic activity in a chronic glaucomatous model. *Sci Rep* 7:1734.

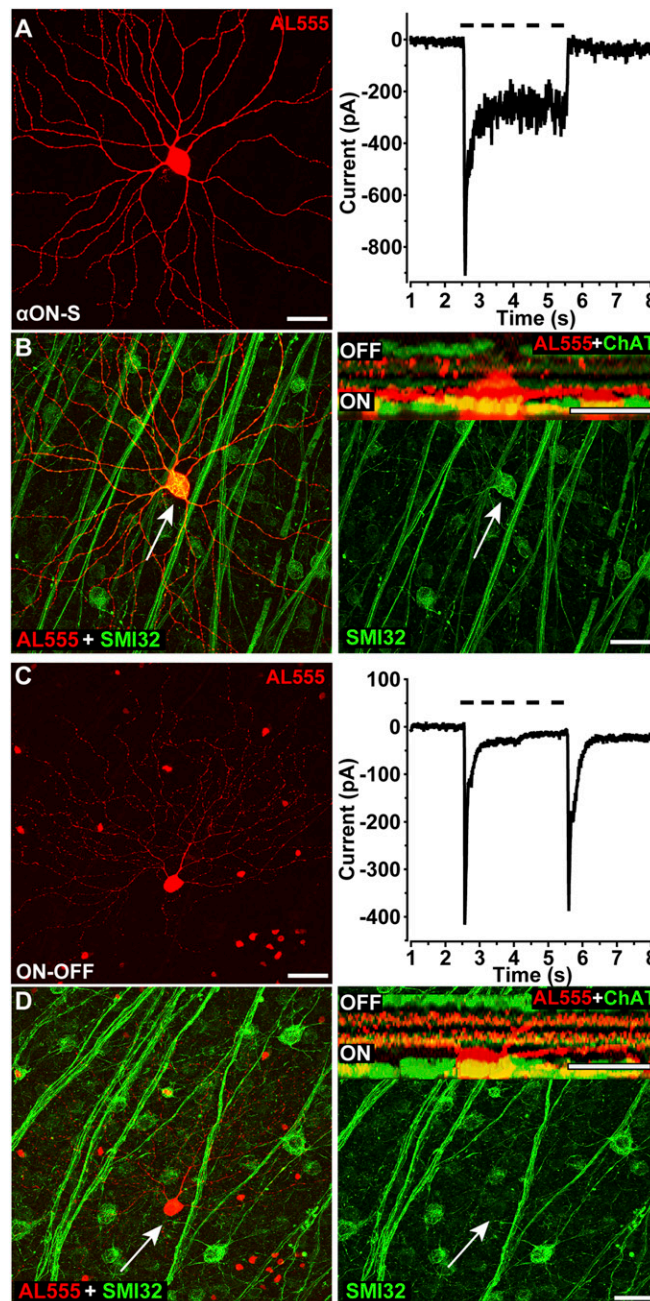

**Fig. S1.** Classification of  $\alpha$ ON-sustained and ON-OFF RGCs. (A, Left) Confocal micrograph of  $\alpha$ ON-sustained ( $\alpha$ ON-S) RGC (control retina) following intracellular filling with Alexa 555 dye (AL555). (A, Right) Current response to light stimulus (dashed line) over time in seconds under voltage clamp ( $-65$  mV) conditions for the same RGC. This type shows a large, brief transient inward (depolarizing) current followed by a sustained component for the duration of the stimulus, consistent with published recordings (1, 2). (B) AL555-filled  $\alpha$ ON-S RGC (red) strongly expresses nonphosphorylated neurofilament H protein (SMI32, green). (Inset) Orthogonal rotation shows dendrites ramifying narrowly in the ON sublamina relative to label for choline acetyltransferase (ChAT, green). (C, Left) ON-OFF RGC from CTRL retina following AL555 filling. (C, Right) This ON-OFF type shows transient inward current to both light onset and offset as in other published recordings (3, 4). (D) AL555-filled ON-OFF RGC (red) has negligible immunolabeling for SMI32 (green). (Inset) Orthogonal rotation shows dual dendritic arbors in both ON and OFF sublaminae, shown with ChAT label (green) for reference. (Scale bar:  $40 \mu\text{m}$ .)

1. Pang JJ, Gao F, Wu SM (2003) Light-evoked excitatory and inhibitory synaptic inputs to ON and OFF alpha ganglion cells in the mouse retina. *J Neurosci* 23:6063–6073.
2. van Wyk M, Wässle H, Taylor WR (2009) Receptive field properties of ON- and OFF-ganglion cells in the mouse retina. *Vis Neurosci* 26:297–308.
3. Trenholm S, Johnson K, Li X, Smith RG, Awatramani GB (2011) Parallel mechanisms encode direction in the retina. *Neuron* 71:683–694.
4. Yoshida K, et al. (2001) A key role of starburst amacrine cells in originating retinal directional selectivity and optokinetic eye movement. *Neuron* 30:771–780.



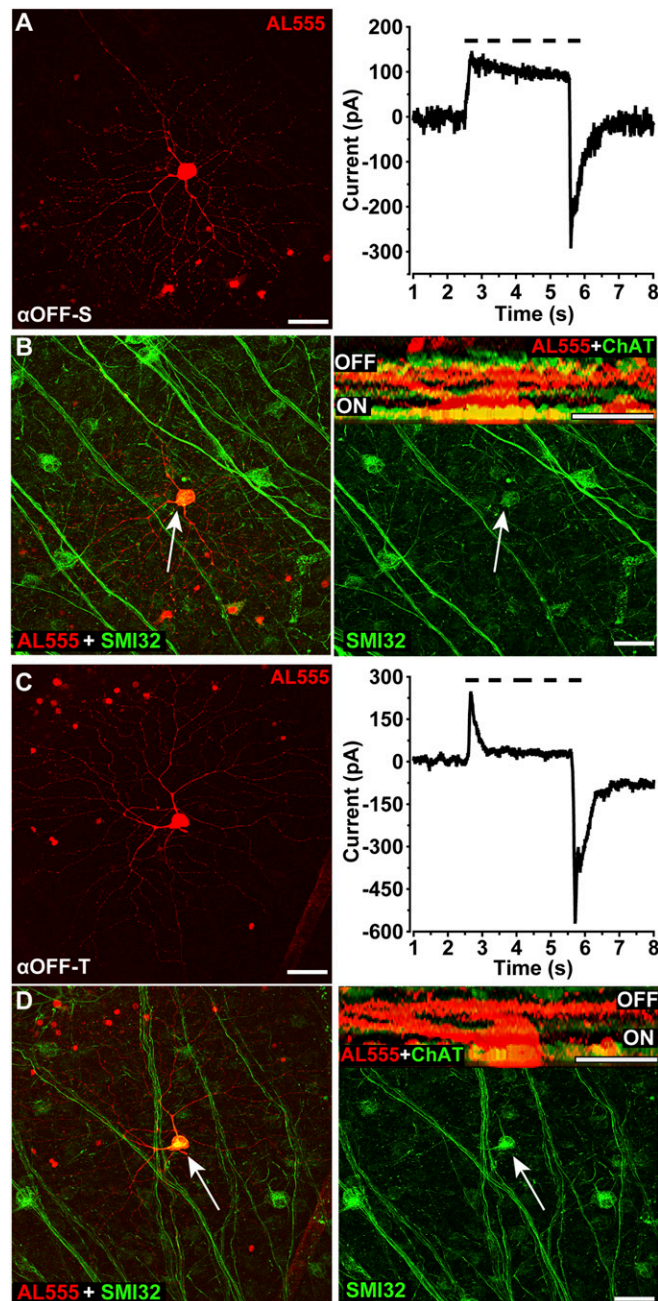

**Fig. S2.** Classification of  $\alpha$ OFF RGCs. (A, Left) Confocal micrograph of  $\alpha$ OFF-S RGC (control retina) following intracellular filling (AL555). (A, Right) Current response to light stimulus (dashed line) over time in seconds under voltage clamp ( $-65$  mV) conditions. The  $\alpha$ OFF-S type shows sustained outward current during the stimulus and inward current at light offset, as in other published recordings (1, 2). (B) AL555-filled  $\alpha$ OFF-S RGC (red) also expresses SMI32 (green). (Inset) Orthogonal rotation shows stratification in the OFF sublamina, highlighted by ChAT label (green) for reference. (C, Left)  $\alpha$ OFF-T RGC from CTRL retina following AL555 filling. (C, Right) Current response to light shows transient inward current at light offset and smaller transient outward current at onset, consistent with published recordings (1). (D)  $\alpha$ OFF-T RGCs strongly express SMI32 with dendrites ramifying narrowly in the OFF sublamina relative to ChAT (Inset). (Scale bars:  $40\ \mu\text{m}$ .)

1. Pang JJ, Gao F, Wu SM (2003) Light-evoked excitatory and inhibitory synaptic inputs to ON and OFF alpha ganglion cells in the mouse retina. *J Neurosci* 23:6063–6073.

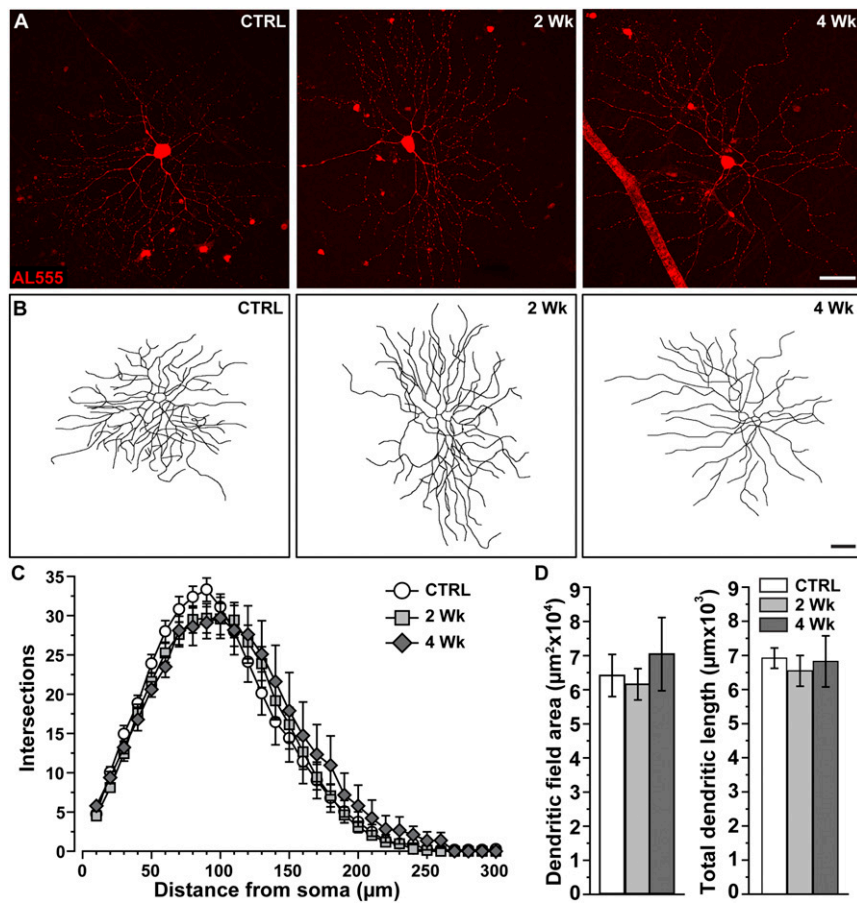

**Fig. 53.**  $\alpha$ OFF-S RGCs are less vulnerable to dendritic pruning than  $\alpha$ ON-S. (A) Examples of  $\alpha$ OFF-S RGCs from CTRL, 2-wk, and 4-wk retinas. (B) Reconstructions of  $\alpha$ OFF-S RGCs show little change in dendritic arborization with elevated IOP. (Scale bars: A and B, 40  $\mu$ m.) (C) Sholl analysis shows no change in complexity for either 2-wk ( $n = 15$ ) or 4-wk ( $n = 7$ )  $\alpha$ OFF-S RGCs compared with CTRL ( $n = 12$ ).  $P = 0.68$ , two-way ANOVA. (D) Elevated IOP does not significantly affect dendritic field area and length for either 2-wk or 4-wk groups ( $P \geq 0.52$ ,  $t$  tests). Data: mean  $\pm$  SEM.









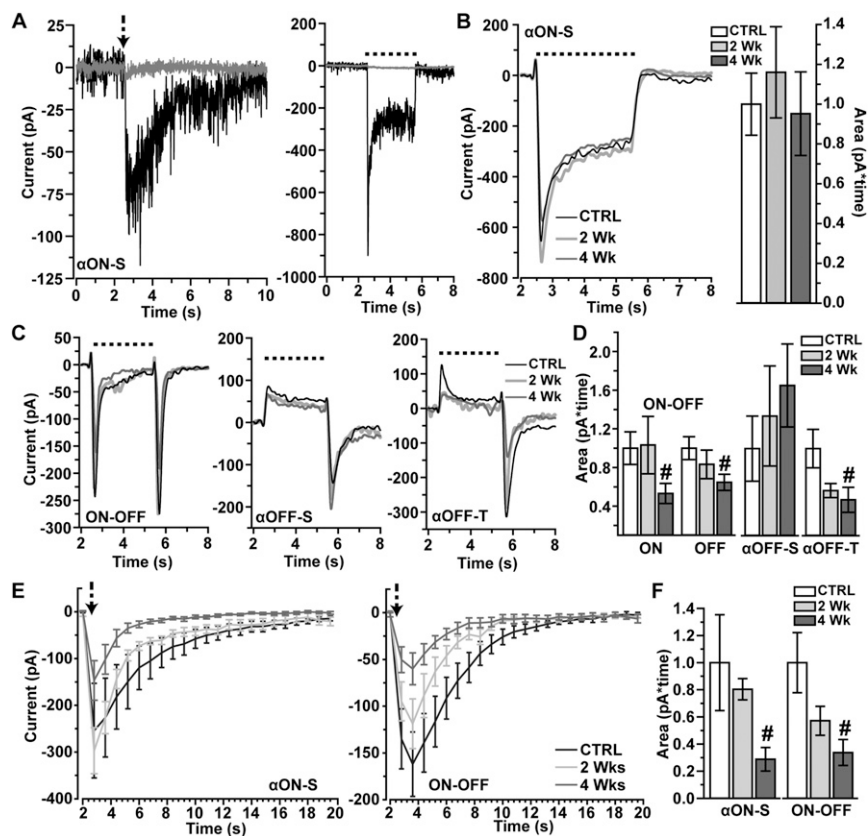

**Fig. S7.** Enhanced RGC light response is not mediated by AMPA receptor signaling. (A) Voltage-clamped ( $-65$  mV) current responses of a control  $\alpha$ ON-S RGC to a 20-ms puff of AMPA (Left, arrow) or a 3-s pulse of light (Right, dashed line) before (black traces) and after (gray traces) bath application of  $100 \mu\text{M}$  CNQX to block AMPA receptor activation. The bath also contained TTX, PTX, strychnine, and AP5 to block, respectively, voltage-gated sodium channels,  $\text{GABA}_A$  receptors, glycine receptors, and NMDA receptors. After addition of CNQX, inward currents evoked by either AMPA or light are eradicated, consistent with the known role for AMPA receptors in mediating glutamatergic excitation in RGCs (1, 2). (B, Left) AMPA receptor-mediated current responses to 3-s light stimulus (dashed line) averaged for CTRL ( $n = 3$ ), 2-wk ( $n = 4$ ), and 4-wk ( $n = 5$ )  $\alpha$ ON-S RGCs under voltage clamp to prevent chloride-driven inhibitory currents ( $-65$  mV). (B, Right) Average AMPA-mediated response for  $\alpha$ ON-S RGCs integrated over the duration of the light stimulus did not differ between groups ( $P = 0.75$ ). (C, Left) AMPA receptor-mediated current responses to light stimulus (dashed line) under voltage clamp ( $-65$  mV) averaged from CTRL ( $n = 6$ ), 2-wk ( $n = 5$ ), and 4-wk ( $n = 7$ ) ON-OFF RGCs. (C, Center) Same responses for CTRL ( $n = 8$ ), 2-wk ( $n = 9$ ), and 4-wk ( $n = 9$ )  $\alpha$ OFF-S RGCs. (C, Right) Same conditions for CTRL ( $n = 4$ ), 2-wk ( $n = 10$ ), and 4-wk ( $n = 11$ )  $\alpha$ OFF-T RGCs. (D) Average integrated AMPA-mediated response for ON-OFF,  $\alpha$ OFF-S, and  $\alpha$ OFF-T RGCs. ON component for ON-OFF RGCs integrated over the duration of the light stimulus; OFF component and responses for  $\alpha$ OFF-S, and  $\alpha$ OFF-T RGCs integrated for 3-s period following light offset. The response for  $\alpha$ OFF-S RGCs did not change with elevated IOP ( $P = 0.16$ ). Whereas 2 wk of elevation had no effect for ON-OFF,  $\alpha$ OFF-S, and  $\alpha$ OFF-T RGCs ( $P \geq 0.22$ ), 4 wk diminished each response significantly ( $^{\#}P \leq 0.05$ ). (E) Average voltage-clamped ( $-65$  mV) current responses from CTRL, 2-wk, and 4-wk  $\alpha$ ON-S (Left) and ON-OFF (Right) RGCs evoked through direct administration of  $100 \mu\text{M}$  AMPA (arrow) to the cell body. (F) Average integrated current response to direct application of AMPA for CTRL ( $n = 12$ ), 2-wk ( $n = 12$ ), and 4-wk ( $n = 11$ )  $\alpha$ ON-S RGCs and for CTRL ( $n = 12$ ), 2-wk ( $n = 13$ ), and 4-wk ( $n = 4$ ) ON-OFF RGCs. AMPA-induced currents decrease at 2 wk and become significantly lower than control by 4 wk ( $^{\#}P \leq 0.05$ ). Data: mean  $\pm$  SEM.

1. Kalbaugh TL, Zhang J, Diamond JS (2009) Coagonist release modulates NMDA receptor subtype contributions at synaptic inputs to retinal ganglion cells. *J Neurosci* 29:1469–1479.
2. Sullivan SJ, Miller RF (2012) AMPA receptor-dependent, light-evoked D-serine release acts on retinal ganglion cell NMDA receptors. *J Neurophysiol* 108:1044–1051.

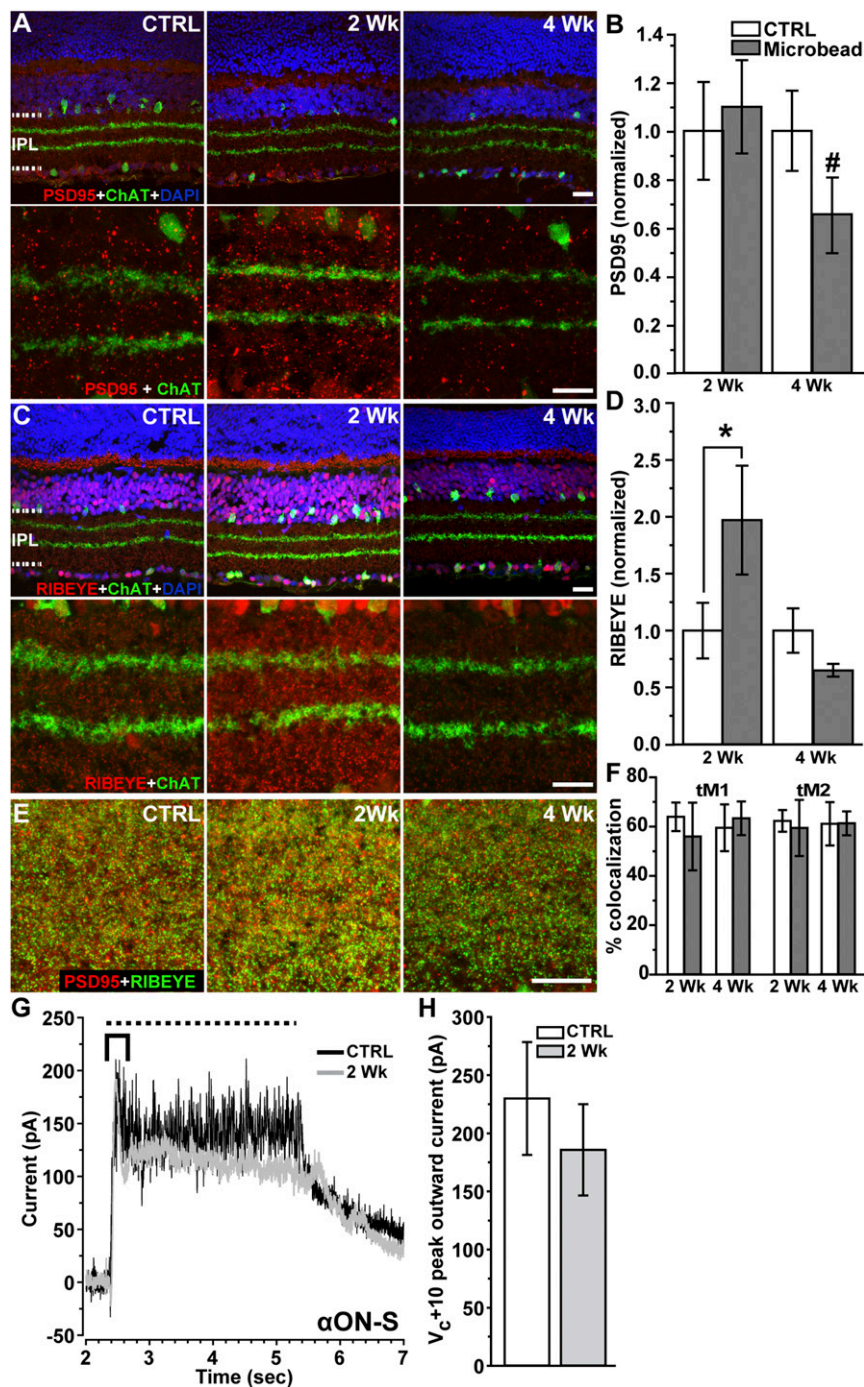

**Fig. 58.** IOP-induced changes in glutamatergic signaling components. (A) Confocal micrographs of vertical sections from CTRL, 2-wk, and 4-wk retinas labeled for the postsynaptic density protein PSD95 and ChAT and counterstained with the nuclear dye DAPI for reference. Higher magnification of inner plexiform layer (IPL, Lower) shows decrease in PSD95 in 4-wk retina. (B) Mean levels of PSD95 relative to ChAT and normalized with respect to CTRL ( $n = 8$ ) retina do not change in 2-wk ( $n = 8$ ) retina ( $P = 0.64$ ), but diminish in 4-wk ( $n = 6$ ) retina ( $^{*}P = 0.003$ ). (C) Label for the presynaptic ribbon protein RIBEYE relative to ChAT and DAPI for reference. Higher magnification of IPL (Lower) shows increase in RIBEYE for 2-wk retina. (D) Mean levels of RIBEYE relative to ChAT and normalized to CTRL retina increased after 2 wk ( $P = 0.04$ ), but returned to CTRL levels by 4 wk ( $P = 0.14$ ). Sample numbers same as for PSD95. (E) High-magnification confocal micrographs of IPL colabeled for PSD95 and RIBEYE show little change in colocalization with elevated IOP. (F) Percent colocalization of PSD95 with RIBEYE (tM1) and of RIBEYE with PSD95 (tM2) do not change with either 2 wk ( $n = 3$  retina) or 4 wk ( $n = 3$ ) of elevated IOP compared with CTRL ( $n = 3$ ) retina ( $P \geq 0.47$ ). (G) Current responses of CTRL and 2-wk  $\alpha$ ON-S RGCs to a 3-s pulse of light (dashed line) under voltage clamp near cation channel equilibrium (+10 mV) to isolate inhibitory chloride currents. Cells demonstrate sustained outward current with similar peaks (bracket) due to chloride influx (1) (Methods). (H) Average light-induced peak outward (inhibitory) current due to chloride is similar for CTRL ( $n = 2$ ) and 2-wk ( $n = 3$ )  $\alpha$ ON-S RGCs ( $P = 0.5$ ). (Scale bars: A, C, and E, 20  $\mu$ m.) Data: mean  $\pm$  SEM.

1. Pang JJ, Gao F, Wu SM (2003) Light-evoked excitatory and inhibitory synaptic inputs to ON and OFF alpha ganglion cells in the mouse retina. *J Neurosci* 23:6063–6073.
